# Supplementary material
Source: publisher figshare collection journal article supplement (https://frontiersin.figshare.com/ndownloader/files/18135707)
Supplement: Supplementary file [file 18135707]

Suppl. Table 9: Processing body Signal Intensity (DDX6 marker in Fig. 1).

| T (h) | 8                 | 12                | 16                | 20                | 24                | 28                | 32               | 36                | 40     | 44     | 48     | 52     | 56     | 60     | 64    | 68 |
|-------|-------------------|-------------------|-------------------|-------------------|-------------------|-------------------|------------------|-------------------|--------|--------|--------|--------|--------|--------|-------|----|
| 8     |                   |                   |                   |                   |                   |                   |                  |                   |        |        |        |        |        |        |       |    |
| 12    | -0.96             |                   |                   |                   |                   |                   |                  |                   |        |        |        |        |        |        |       |    |
| 16    | 37.88             | 38.84             |                   |                   |                   |                   |                  |                   |        |        |        |        |        |        |       |    |
| 20    | -40.33            | -39.37            | -78.21            |                   |                   |                   |                  |                   |        |        |        |        |        |        |       |    |
| 24    | -6.50             | -5.54             | -44.38            | 33.83             |                   |                   |                  |                   |        |        |        |        |        |        |       |    |
| 28    | -15.98            | -15.02            | -53.86            | 24.35             | -9.48             |                   |                  |                   |        |        |        |        |        |        |       |    |
| 32    | -57.47            | -56.51            | -95.35            | -17.14            | -50.97            | -41.49            |                  |                   |        |        |        |        |        |        |       |    |
| 36    | -11.69            | -10.73            | -49.57            | 28.64             | -5.19             | 4.29              | 45.78            |                   |        |        |        |        |        |        |       |    |
| 40    | <b>-150.20***</b> | <b>-149.20***</b> | <b>-188.10***</b> | <b>-109.90*</b>   | <b>-143.70***</b> | <b>-134.20***</b> | -92.73           | <b>-138.50***</b> |        |        |        |        |        |        |       |    |
| 44    | <b>-170.20***</b> | <b>-169.20***</b> | <b>-208.00***</b> | <b>-129.80**</b>  | <b>-163.70***</b> | <b>-154.20***</b> | <b>-112.70*</b>  | <b>-158.50***</b> | -19.95 |        |        |        |        |        |       |    |
| 48    | <b>-170.80***</b> | <b>-169.80***</b> | <b>-208.60***</b> | <b>-130.40***</b> | <b>-164.30***</b> | <b>-154.80***</b> | <b>-113.30*</b>  | <b>-159.10***</b> | -20.57 | -0.62  |        |        |        |        |       |    |
| 52    | <b>-139.30**</b>  | <b>-138.30**</b>  | <b>-177.20***</b> | -98.98            | <b>-132.80**</b>  | <b>-123.30*</b>   | -81.83           | <b>-127.60**</b>  | 10.89  | 30.84  | 31.46  |        |        |        |       |    |
| 56    | <b>-163.10***</b> | <b>-162.20***</b> | <b>-201.00***</b> | <b>-122.80**</b>  | <b>-156.60***</b> | <b>-147.10***</b> | <b>-105.70*</b>  | <b>-151.40***</b> | -12.93 | 7.02   | 7.64   | -23.82 |        |        |       |    |
| 60    | <b>-177.90***</b> | <b>-177.00***</b> | <b>-215.80***</b> | <b>-137.60***</b> | <b>-171.40***</b> | <b>-162.00***</b> | <b>-120.50**</b> | <b>-166.30***</b> | -27.74 | -7.79  | -7.17  | -38.63 | -14.81 |        |       |    |
| 64    | <b>-178.10***</b> | <b>-177.20***</b> | <b>-216.00***</b> | <b>-137.80***</b> | <b>-171.60***</b> | <b>-162.10***</b> | <b>-120.70**</b> | <b>-166.40***</b> | -27.93 | -7.98  | -7.36  | -38.82 | -15.00 | -0.19  |       |    |
| 68    | <b>-188.00***</b> | <b>-187.10***</b> | <b>-225.90***</b> | <b>-147.70***</b> | <b>-181.50***</b> | <b>-172.10***</b> | <b>-130.60**</b> | <b>-176.40***</b> | -37.85 | -17.90 | -17.28 | -48.74 | -24.92 | -10.11 | -9.92 |    |

Dunn's Multiple Comparison test for variable Processing bodies covered by cells. Difference in rank sum.

\*In bold  $p \leq 0.05$ .
